# Supplementary material for: AAV1.NT-3 gene therapy for X-linked Charcot–Marie–Tooth neuropathy type 1
Source: PubMed Central journal article supplement (PMC9013664; doi:10.1038/s41434-021-00231-3), 2021-02-04
Supplement: 41434_2021_231_MOESM1_ESM.pdf [file 41434_2021_231_MOESM1_ESM.pdf]

# **AAV1.NT-3 gene therapy for X-linked Charcot-Marie-Tooth Neuropathy type 1**

Burcak Ozes<sup>1</sup>, Morgan Myers<sup>1</sup>, Kyle Moss<sup>1</sup>, Jennifer Mckinney<sup>1</sup>, Alicia Ridgley<sup>1</sup>, Lei Chen<sup>1</sup>, Shasha Bai<sup>2,3</sup>, Charles K. Abrams<sup>4</sup>, Mona M. Freidin<sup>4</sup>,  
Jerry R. Mendell<sup>1,5</sup>, Zarife Sahenk<sup>1,5,6</sup>

1 Center for Gene Therapy, The Abigail Wexner Research Institute at Nationwide Children's Hospital, Columbus, Ohio

2 Department of Biomedical Informatics, The Ohio State University College of Medicine

3 Biostatistics Resource at Nationwide Children's Hospital

4 Department of Neurology and Rehabilitation, University of Illinois at Chicago

5 Department of Pediatrics and Neurology, Nationwide Children's Hospital and The Ohio State University

6 Department of Pathology and Laboratory Medicine, Nationwide Children's Hospital, Columbus, Ohio

Corresponding author:

Zarife Sahenk, MD, PhD.

Director, Neuromuscular Pathology

700 Children's Drive Rm WA 3024

Tel: 614-722-2875

Fax: 614-722-3273

Email: [zarife.sahenk@nationwidechildrens.org](mailto:zarife.sahenk@nationwidechildrens.org)

**Supplementary Data**

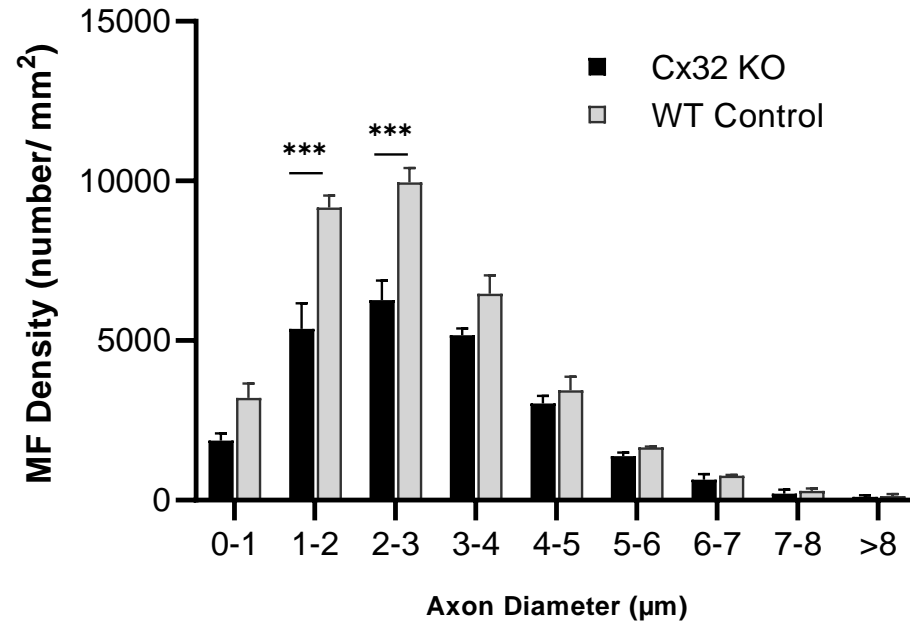

**Supplementary Figure 1.** Myelinated fiber-axon size distribution in the regenerating sciatic nerves, 5 mm distal to crush site from Cx32 KO and wild type control mice at 2 months post-crush. Small myelinated fiber subpopulation with axon size within 1-2 µm and 2-3 in diameter range was significantly less the Cx32 KO regenerating nerves. The total number of myelinated fiber density (Cx32 KO:  $24026.8 \pm 1548.1$  vs. WT:  $35095.1 \pm 1283.3$ ;  $p < 0.0001$ ) is markedly reduced in Cx32 KO compared to WT regenerating nerves. Error bars represent  $\pm$  SEM; \*\*\* $p \leq 0.001$ , \*\*\*\* $p \leq 0.0001$ ,  $n = 3$  per group; Bonferroni's multiple comparisons test.

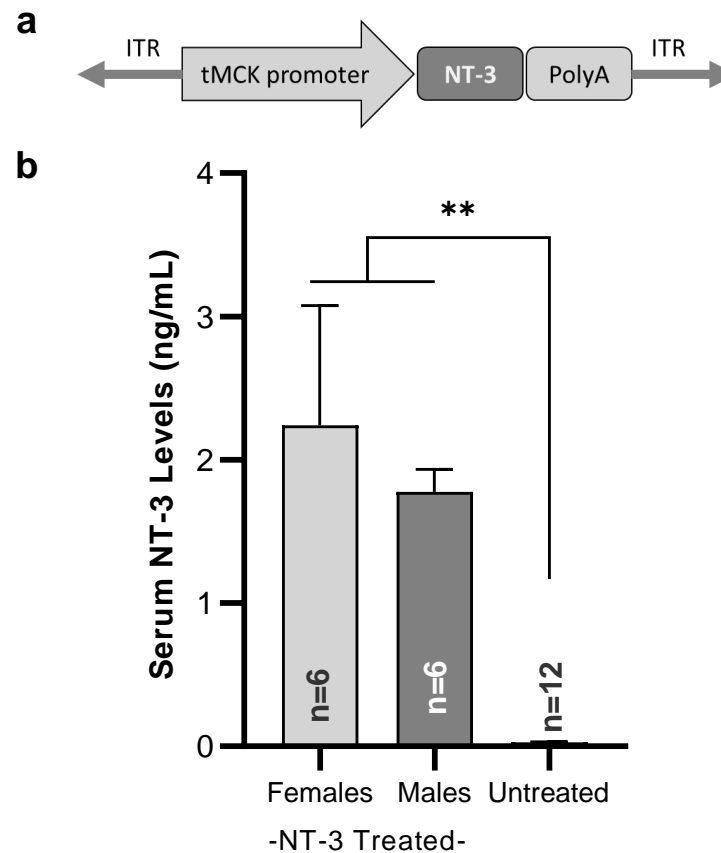

**Supplementary Figure 2.** scAAV1.tMCK.NT-3 vector and NT-3 serum levels. (a) NT-3 expression is driven by a tMCK in the scAAV vector backbone. The diagram shows the cassette composed of a tMCK enhancer/ promoter region (714 bp), the full-length NT-3 cDNA (774 bp) and the SV40 polyA tail (211 bp). (b) Cx32 KO mice were injected with  $1 \times 10^{11}$  vg of scAAV1.tMCK.NT-3 into the right gastrocnemius muscles or Ringer's lactate as control. Serum samples were obtained from treated and untreated Cx32 KO mice via cardiac puncture at six months post-treatment/endpoint, and NT-3 levels were determined by using enzyme-linked immunosorbent assay; shown separately in females and males. Error bars are  $\pm$  SEM; n=12 (NT-3 treated), n=12 (UT), \*\*P< 0.01; unpaired t test.

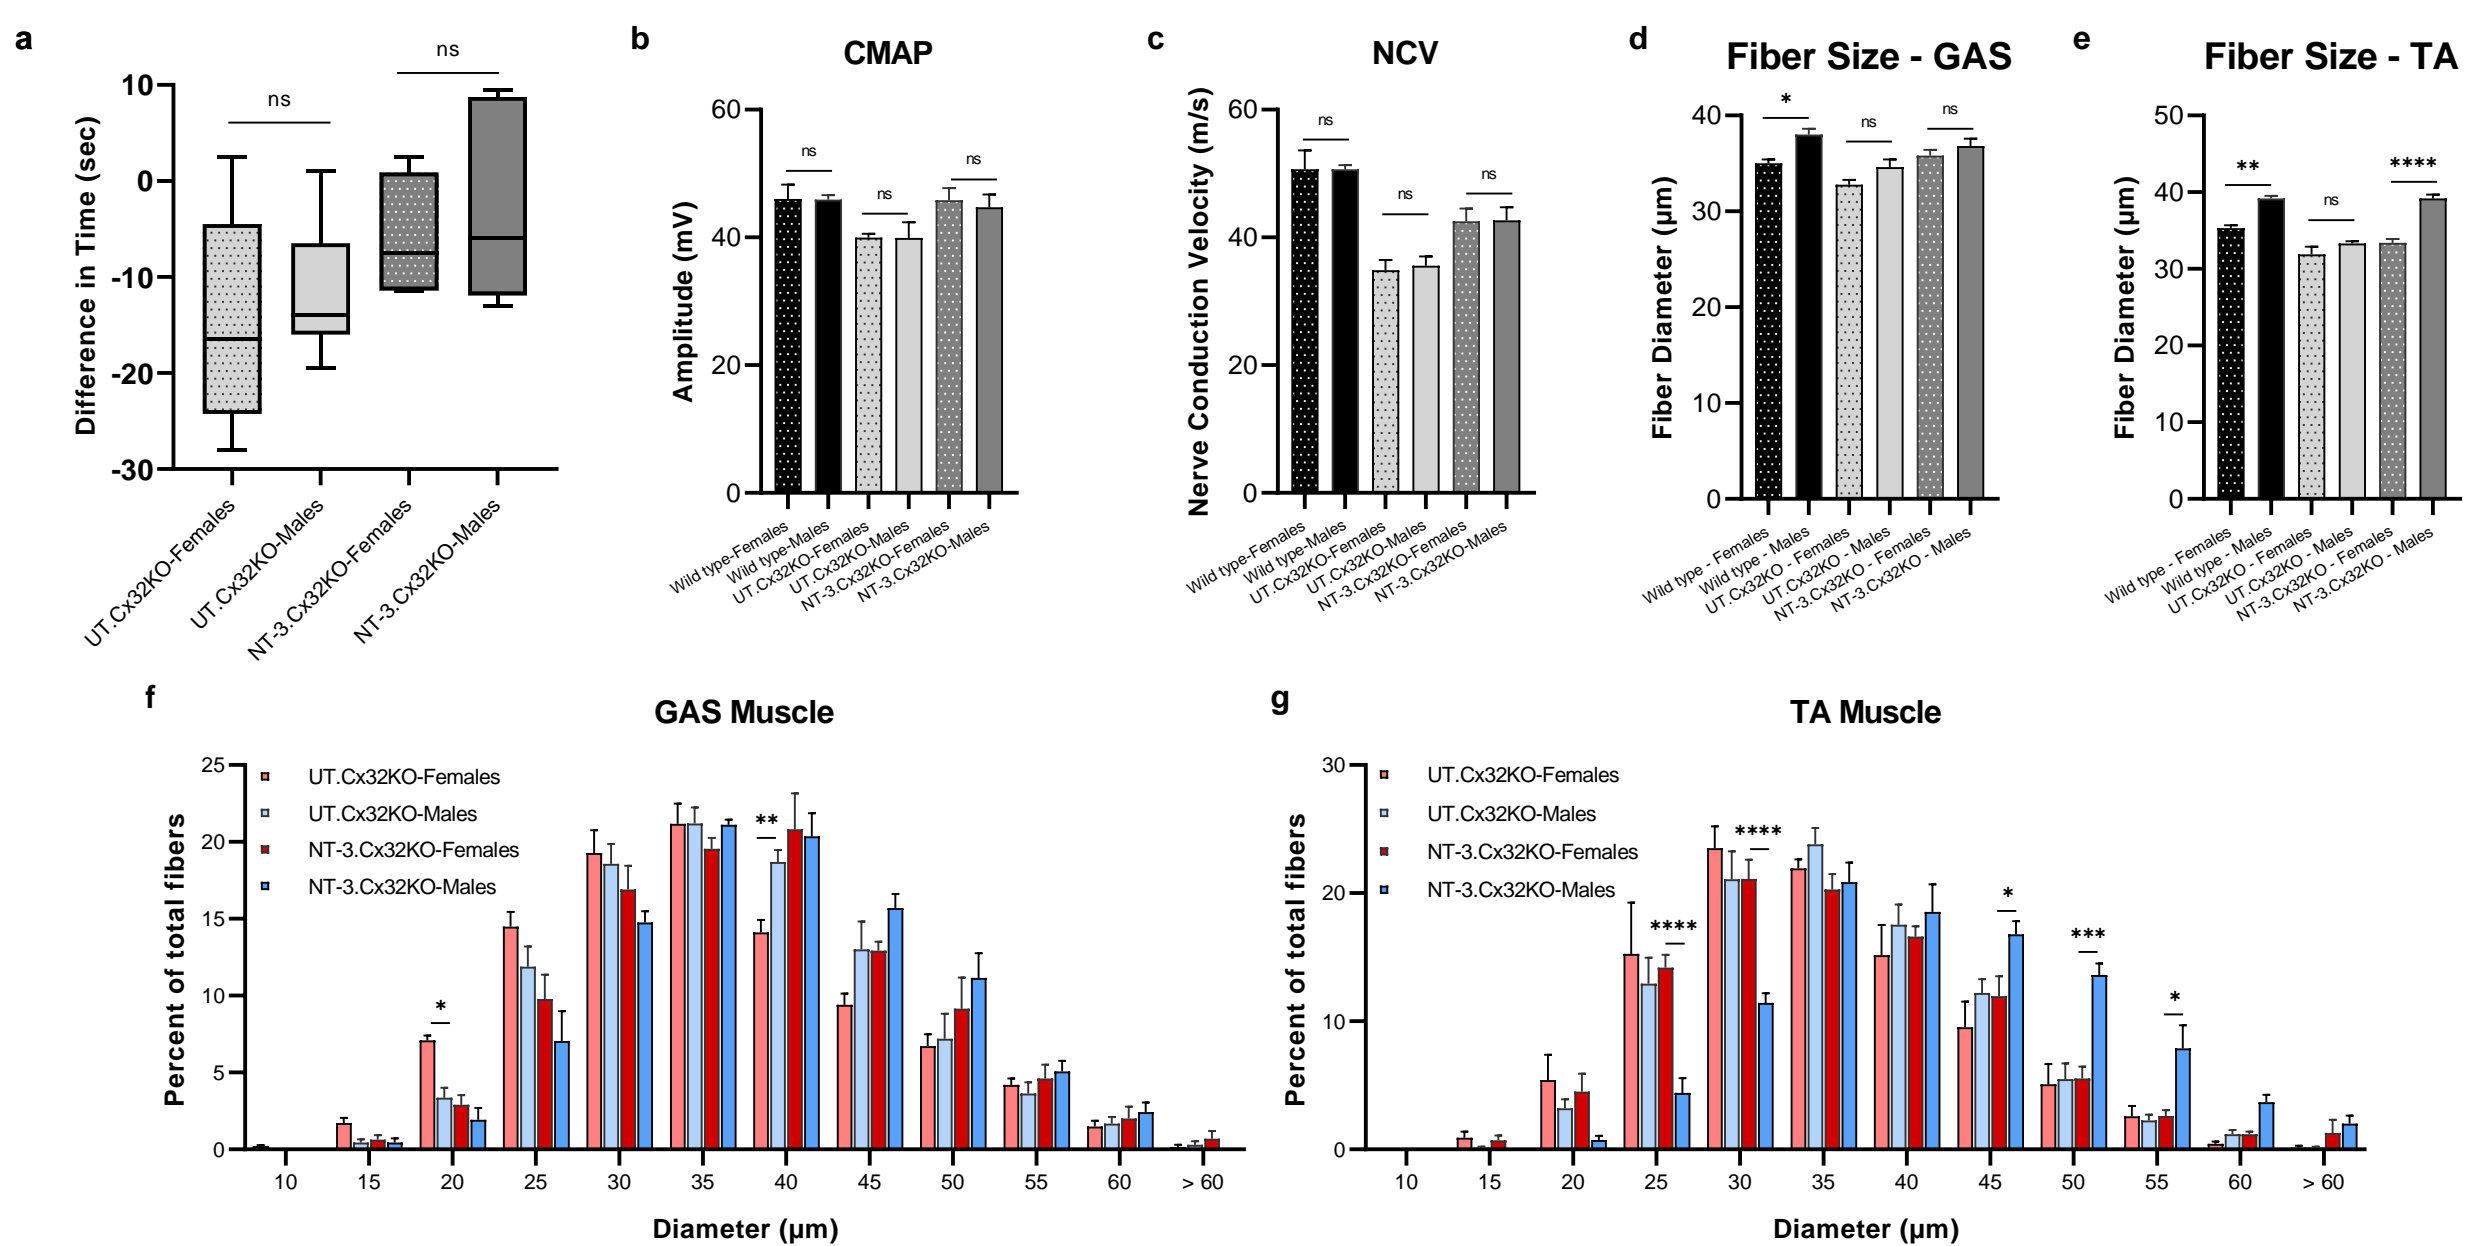

**Supplementary Figure 3.** The graphs showing analyses on rotarod (a), electrophysiology (b,c), muscle fiber size (d,e) and muscle fiber size distribution (f,g) separated by sex. Error bars represent  $\pm$  SEM; ns  $p > 0.05$ , \*  $p \leq 0.05$ , \*\*  $p \leq 0.01$ , \*\*\*  $p \leq 0.001$ , \*\*\*\*  $p \leq 0.0001$ , Tukey's multiple comparisons test.

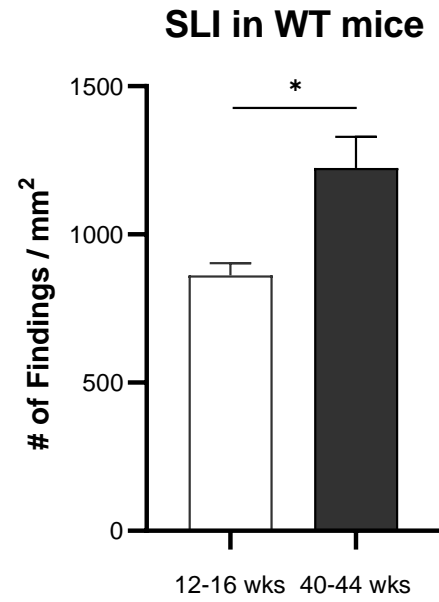

**Supplementary Figure 4.** Histopathological quantitative analysis of Schmidt-Lanterman incisures (SLIs) performed on sciatic nerves of young (12-16 wks) and old (40-44 wks) wild type mice. Old cohort shows an increase in the number of SLI compared to young mice. Error bars represent  $\pm$  SEM; \* $p=0.031$ ,  $n=4$  per group; unpaired t test.

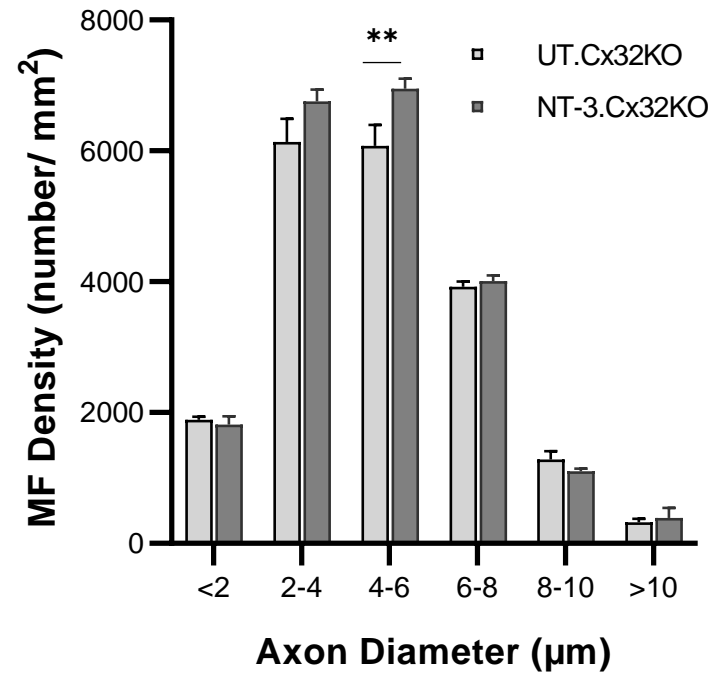

**Supplementary Figure 5.** Myelinated fiber distribution in the sciatic nerves from NT-3 treated and untreated Cx32 mice. An increase in the subpopulation of axons 2-6 µm in diameter was seen with treatment. Error bars represent ± SEM; \*\*p=0.0046, n=6 per group; Bonferroni's multiple comparisons test.

**Supplementary Table 1** Average G ratios of the sciatic nerves from Cx32KO mice

| <b>Cohorts</b>   | <b><i>n</i></b> | <b>Number of measurements</b> | <b>Mean <math>\pm</math> SEM</b> |
|------------------|-----------------|-------------------------------|----------------------------------|
| Untreated        | 5               | 2858                          | 0.761 $\pm$ 0.001                |
| NT-3 Treated     | 4               | 2167                          | 0.663 $\pm$ 0.002****            |
| Untreated-Female | 3               | 1503                          | 0.752 $\pm$ 0.002                |
| NT-3-Female      | 2               | 1040                          | 0.658 $\pm$ 0.002****            |
| Untreated-Male   | 2               | 1355                          | 0.771 $\pm$ 0.002                |
| NT-3-Male        | 2               | 1127                          | 0.667 $\pm$ 0.002****            |

\*\*\*\* $p \leq 0.0001$  between NT-3 treated and untreated, unpaired t test

**Supplementary Table 2** Myelinated fiber density (number/mm<sup>2</sup>) in the sciatic nerves from Cx32KO and wild type mice

| <b>Cohorts</b>       | <b><i>n</i></b> | <b>Mean ± SEM</b> |
|----------------------|-----------------|-------------------|
| Untreated            | 6               | 19,636 ± 609      |
| NT-3                 | 6               | 21,030 ± 197      |
| WT (age-matched)     | 4               | 20,249 ± 356      |
| WT (young/12-16 wks) | 3               | 21,071 ± 267      |



**Supplementary Table 3** Mean muscle fiber diameter in gastrocnemius and tibialis anterior samples from Cx32 KO and WT mice

| Fiber Type | Gastrocnemius   |                              |                 |                            |                    |                            |
|------------|-----------------|------------------------------|-----------------|----------------------------|--------------------|----------------------------|
|            | Wild type (n=8) |                              | Untreated (n=8) |                            | NT-3 Treated (n=8) |                            |
|            | Number          | Diameter ( $\mu\text{m}$ )   | Number          | Diameter ( $\mu\text{m}$ ) | Number             | Diameter ( $\mu\text{m}$ ) |
| STO        | 101.9 $\pm$ 6.8 | 30.0 $\pm$ 0.7 <sup>††</sup> | 79.1 $\pm$ 6.1  | 26.4 $\pm$ 0.6             | 75.9 $\pm$ 6.2     | 29.3 $\pm$ 0.8*            |
| FTO        | 48.5 $\pm$ 2.6  | 34.1 $\pm$ 0.7 <sup>††</sup> | 91.3 $\pm$ 4.5  | 30.7 $\pm$ 0.6             | 77.5 $\pm$ 6.2     | 34.0 $\pm$ 1.0**           |
| FTG        | 170.5 $\pm$ 6.3 | 41.2 $\pm$ 1.0 <sup>†</sup>  | 178.8 $\pm$ 8.8 | 38.5 $\pm$ 0.6             | 182.6 $\pm$ 8.6    | 40.2 $\pm$ 0.6             |
| All fiber  | 320.9 $\pm$ 9.7 | 36.5 $\pm$ 0.8 <sup>†</sup>  | 349.1 $\pm$ 6.0 | 33.7 $\pm$ 0.6             | 336.0 $\pm$ 10.4   | 36.3 $\pm$ 0.5*            |

  

| Fiber Type | Tibialis anterior |                              |                  |                            |                    |                            |
|------------|-------------------|------------------------------|------------------|----------------------------|--------------------|----------------------------|
|            | Wild type (n=8)   |                              | Untreated (n=8)  |                            | NT-3 Treated (n=8) |                            |
|            | Number            | Diameter ( $\mu\text{m}$ )   | Number           | Diameter ( $\mu\text{m}$ ) | Number             | Diameter ( $\mu\text{m}$ ) |
| STO        | 91.6 $\pm$ 10.1   | 30.5 $\pm$ 1.0 <sup>††</sup> | 90.6 $\pm$ 7.2   | 25.7 $\pm$ 0.6             | 88.6 $\pm$ 11.0    | 27.9 $\pm$ 1.2             |
| FTO        | 66.3 $\pm$ 3.5    | 36.3 $\pm$ 1.1 <sup>††</sup> | 95.6 $\pm$ 7.5   | 32.1 $\pm$ 0.9             | 92.5 $\pm$ 7.8     | 35.2 $\pm$ 1.2             |
| FTG        | 162.5 $\pm$ 5.7   | 41.5 $\pm$ 0.7 <sup>††</sup> | 167.5 $\pm$ 6.3  | 36.6 $\pm$ 0.7             | 160.4 $\pm$ 9.6    | 41.2 $\pm$ 1.0**           |
| All fiber  | 320.4 $\pm$ 13.6  | 37.2 $\pm$ 0.9 <sup>††</sup> | 353.8 $\pm$ 14.7 | 32.6 $\pm$ 0.8             | 341.5 $\pm$ 19.2   | 36.3 $\pm$ 1.2*            |

Data represented as mean  $\pm$  SEM

\*p  $\leq$  0.05, \*\*p  $\leq$  0.01 between NT-3 treated and untreated group at the end point

<sup>†</sup>p  $\leq$  0.05, <sup>††</sup>p  $\leq$  0.01, <sup>†††</sup>p  $\leq$  0.001 between WT and untreated group at the end point, Tukey's multiple comparisons test.
